# Supplementary material
Source: PubMed Central journal article supplement (PMC4350566)
Supplement: SD8.pdf [file SD8.pdf]

SUPPLEMENTAL TABLE 1

List of the 93 human bacterial isolates tested to validate the use of VITEK<sup>®</sup> MS RUO for diagnostic purposes

| Bacteria                            | Number of isolates |
|-------------------------------------|--------------------|
| <i>Acinetobacter baumannii</i>      | 7                  |
| <i>Citrobacter koseri</i>           | 2                  |
| <i>Enterobacter aerogenes</i>       | 1                  |
| <i>Enterobacter cloacae</i>         | 2                  |
| <i>Escherichia coli</i>             | 13                 |
| <i>Enterococcus faecium</i>         | 2                  |
| <i>Enterococcus faecalis</i>        | 8                  |
| <i>Klebsiella oxytoca</i>           | 3                  |
| <i>Klebsiella pneumoniae</i>        | 10                 |
| <i>Morganella morganii</i>          | 1                  |
| <i>Proteus mirabilis</i>            | 2                  |
| <i>Pseudomonas aeruginosa</i>       | 2                  |
| <i>Streptococcus agalactiae</i>     | 8                  |
| <i>Staphylococcus aureus</i>        | 14                 |
| <i>Staphylococcus epidermidis</i>   | 10                 |
| <i>Stenotrophomonas maltophilia</i> | 5                  |
| <i>Streptococcus pyogenes</i>       | 3                  |
